# Supplementary material
Source: publisher figshare collection journal article supplement (https://tandf.figshare.com/ndownloader/files/16784603)
Supplement: Supplementary file 1 [file 16784603]

Appendix. Items used in Experiments 1 and 2.

| Basic level term | Subordinate term | Subordinate term |
| --- | --- | --- |
| ball | basketball | football |
| bird | eagle | pigeon |
| biscuit | oreo | shortbread |
| boat | canoe | rowing boat |
| car | convertible | limo |
| cereal | cheerios | cornflakes |
| chair | armchair | desk chair |
| chocolate | chocolate bar | truffle |
| coin | 1 pound | 50 pence |
| dog | Dalmatian | poodle |
| fish | goldfish | shark |
| flower | rose | daisy |
| gun | pistol | rifle |
| hot drink | tea | coffee |
| house | cottage | mansion |
| phone | iphone | Blackberry |
| pizza | margherita | pepperoni |
| potato | sweet potato | jacket potato |
| shoes | trainers | heels |
| skates | roller skates | ice skates |
| spider | tarantula | black widow |
| tree | palm tree | pine tree |
| trousers | jogging bottoms | jeans |
| wine | red wine | white wine |
